# Supplementary material for: Hazard Ratio and Hazard Index as Preliminary Estimators Associated to the Presence of Furans and Alkylfurans in Belgian Foodstuffs
Source: MDPI journal article supplement (doi:10.3390/foods11162453), 2022-08-14
Supplement: s1 [file s1]

## Supplementary Materials

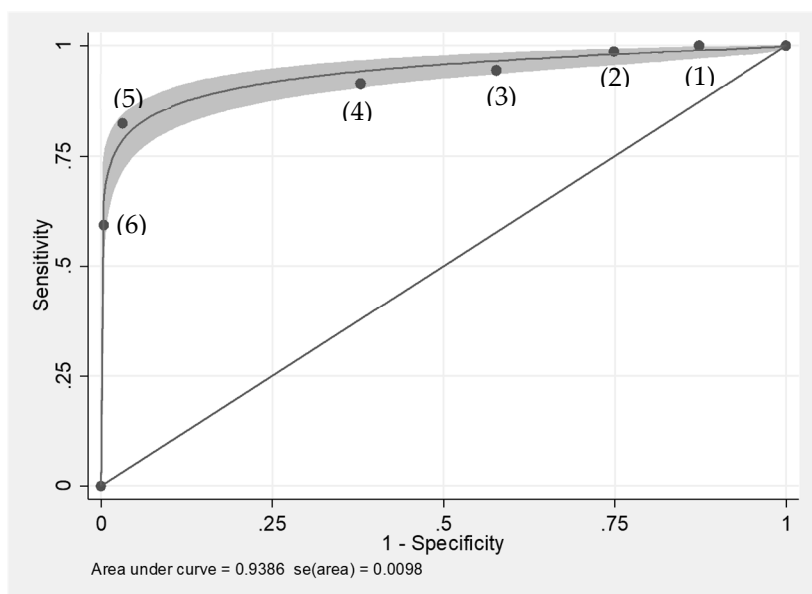

**Figure S1:** The Receiver Operator Characteristic (ROC) curve for furans co-occurrence

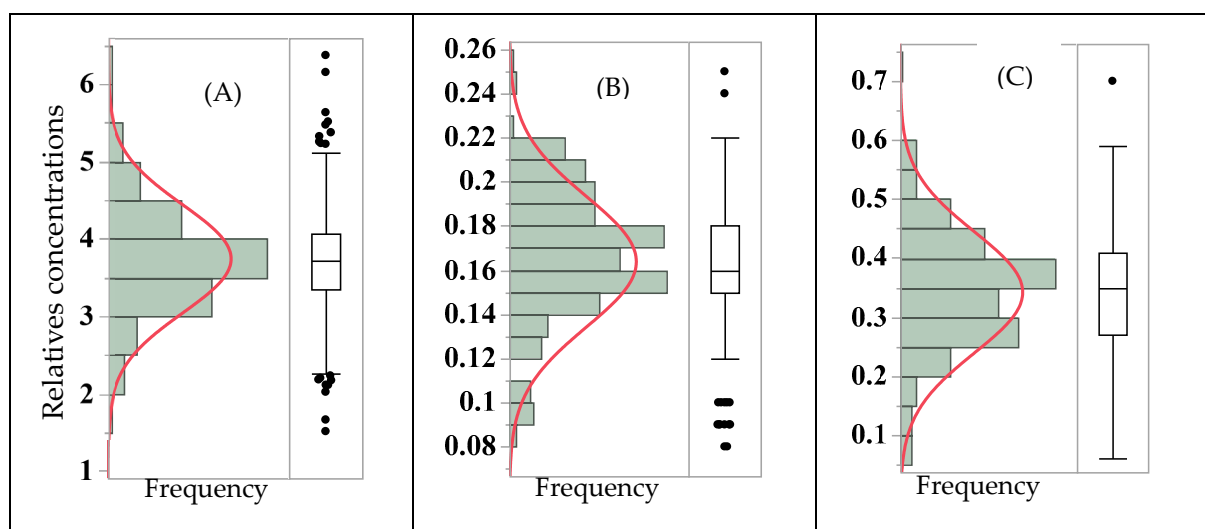

**Figure S2:** The box plots and the histograms of the relative concentrations 2-MeF/furan (A), 3-MeF/furan (B) and 2,5-dMeF/furan (C) in coffee products (n=276). Legend: The center line in the Box plot represents the median; box limits represent the upper and the lower quartiles; whiskers are 1.5x interquartile range; and points are outliers.

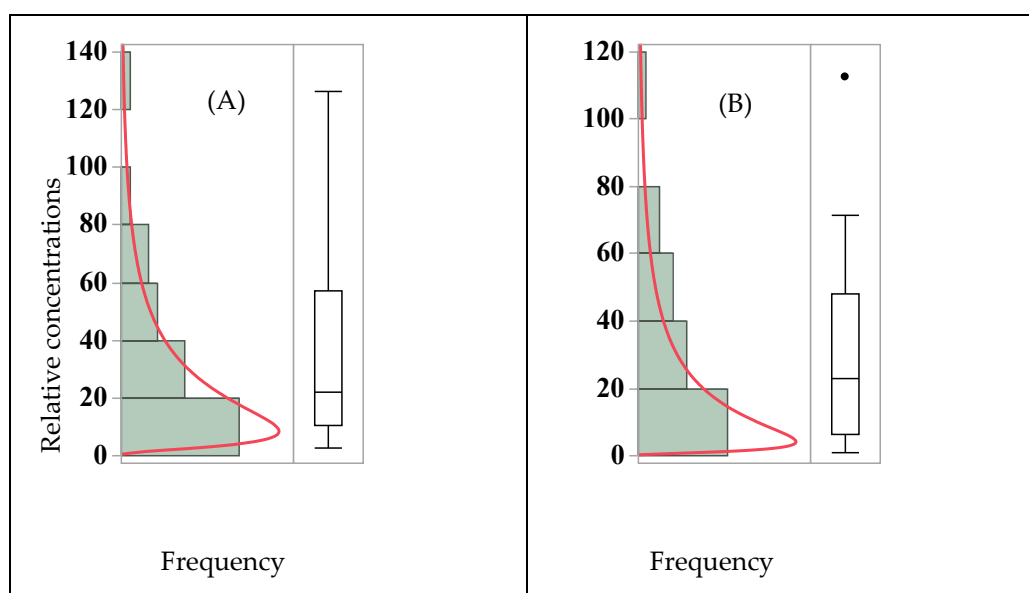

**Figure S3:** The box plots and the histograms of the relative concentration 2-EtF/furan (A), 2-EtF/2-MeF (B) in processed fish products (n=29). Legend: The center line in the Box plot represents the median; box limits represent the upper and the lower quartiles; whiskers are 1.5x interquartile range; and points are outliers.

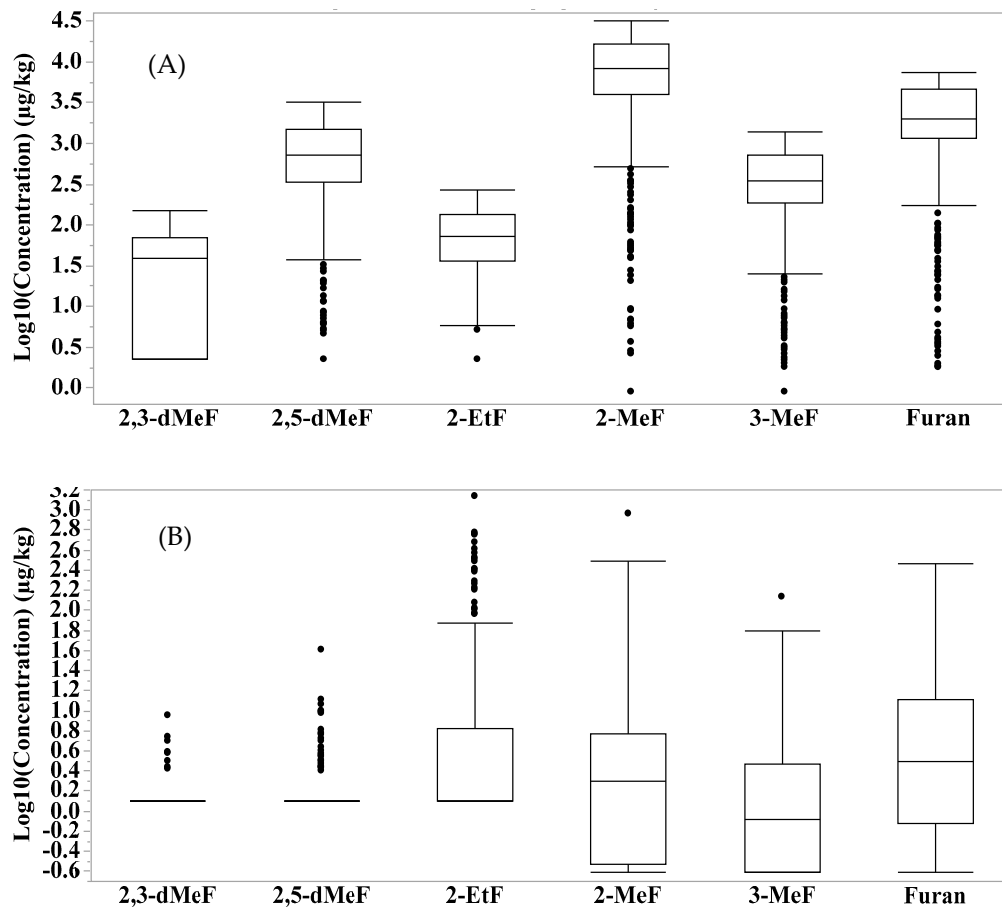

**Figure S4:** The Box plots of the Logarithm of the individual compound concentration in the coffee (A), and in other food groups (B).

Legend: Box plot elements, center line represents the median; box limits represent the upper and the lower quartiles; whiskers are 1.5x interquartile range; and point is an outlier.

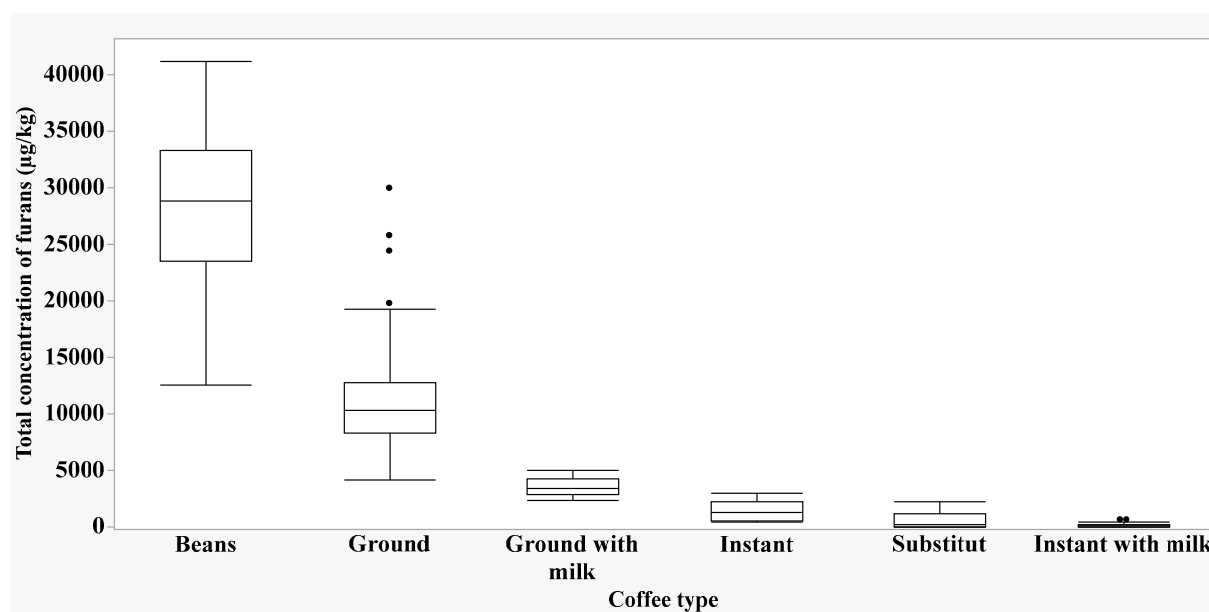

**Figure S5:** The box plots of the total concentrations of furan compounds in coffee products (solid) (n=280)

Legend: Box plot elements, center line represents the median; box limits represent the upper and the lower quartiles; whiskers are 1.5x interquartile range; and point is an outlier.

**Table S1** The frequency of the number of furan compounds detected in coffee versus other foods

| Nb. Compounds<br>(cut-off) | Nb. occurrence<br>in coffee | Nb. occurrence<br>in other foods |
|----------------------------|-----------------------------|----------------------------------|
| 0                          | 0                           | 89                               |
| 1                          | 4                           | 87                               |
| 2                          | 13                          | 120                              |
| 3                          | 9                           | 139                              |
| 4                          | 27                          | 242                              |
| 5                          | 70                          | 20                               |
| 6                          | 180                         | 3                                |
| Total                      | 303                         | 700                              |

**Table S2** The percent of the presence / absence of furan compounds (n: 1003)

|          | Furan | 2-MeF | 3-MeF | 2-EtF | 2,5-dMeF | 2,3-dMeF |
|----------|-------|-------|-------|-------|----------|----------|
| Absence  | 14%   | 18%   | 31%   | 46%   | 69%      | 81%      |
| Presence | 86%   | 82%   | 69%   | 54%   | 31%      | 19%      |

**Table S3** The total concentration ( $\mu\text{g/kg}$ ) of the selected furan compounds in the different food groups

| Level                       | Minimum | Median  | Maximum |
|-----------------------------|---------|---------|---------|
| Coffee and imitates (solid) | 10.5    | 12255.2 | 41146.3 |
| Seafood                     | LOQ     | 42.7    | 1522.6  |
| Bakery                      | LOQ     | 15.5    | 1255.6  |
| Coffee beverages            | 10.4    | 94.2    | 955.2   |
| Composite                   | LOQ     | 17.7    | 419.2   |
| Retail baby food            | LOQ     | 16.3    | 197.9   |
| Snacks                      | LOQ     | 18.6    | 191.1   |
| Herbs and condiments        | LOQ     | 19.2    | 174.5   |
| Sugars and oils             | LOQ     | 5.6     | 147.0   |
| Grains                      | LOQ     | 13.4    | 85.8    |
| Beverages                   | LOQ     | 5.6     | 17.1    |

**Table S4** The hazard index for the selected furan compounds in the different food groups

| Food matrix                           | Number of samples | Min-Max      | Median |
|---------------------------------------|-------------------|--------------|--------|
| Coffee and coffee imitate (beverages) | 303               | ≤0.001-0.570 | 0.068  |
| Seafood                               | 53                | ≤0.001-0.340 | 0.010  |
| Spices and condiments                 | 67                | ≤0.001-0.039 | 0.004  |
| Snacks                                | 108               | ≤0.001-0.043 | 0.004  |
| Composite                             | 107               | ≤0.001-0.094 | 0.004  |
| Baby food (retails)                   | 110               | ≤0.001-0.044 | 0.004  |
| Bakery                                | 92                | ≤0.001-0.280 | 0.003  |
| Grains                                | 83                | ≤0.001-0.019 | 0.003  |
| Sugars and oils                       | 14                | ≤0.001-0.033 | 0.001  |
| Beverages                             | 41                | ≤0.001-0.004 | 0.001  |
| Baby food (homemade)                  | 25                | ≤0.001-0.002 | 0.001  |
